# Supplementary material for: Binge-pattern alcohol consumption and genetic risk as determinants of alcohol-related liver disease
Source: PubMed Central journal article supplement (PMC10721893; doi:10.1038/s41467-023-43064-x), 2023-12-14
Supplement: 41467_2023_43064_MOESM1_ESM.pdf [file 41467_2023_43064_MOESM1_ESM.pdf]

## Supplementary Information

### Binge-Pattern Alcohol Consumption and Genetic Risk Factors as Determinants of Risk of Alcohol-Related Liver Disease

#### Supplementary Notes

|                                                                                                                                            |         |
|--------------------------------------------------------------------------------------------------------------------------------------------|---------|
| <b>Supplemental analyses</b>                                                                                                               |         |
| <b>Supplemental Figure 1:</b> Distribution of PRS for ARLD                                                                                 | Page 2  |
| <b>Supplemental Table 1:</b> Baseline characteristics by alcohol consumption group in UK Biobank                                           | Page 3  |
| <b>Supplemental Table 2:</b> Risk of advanced ARLD with PRS                                                                                | Page 5  |
| <b>Supplemental Table 3:</b> Two-way additive interaction between alcohol consumption and PRS                                              | Page 6  |
| <b>Supplemental Table 4:</b> Two-way additive interaction of diabetes with alcohol consumption and PRS                                     | Page 7  |
| <b>Supplemental analyses using competing risk regression models</b>                                                                        |         |
| <b>Supplemental Table 5:</b> Risk of advanced ARLD with alcohol consumption and PRS – competing risk regression models                     | Page 8  |
| <b>Supplemental Table 6:</b> Risk of ARC by alcohol consumption and PRS – competing risk regression models                                 | Page 9  |
| <b>Supplemental Table 7:</b> Risk of ARC by diabetes and (a) alcohol consumption and (b) PRS – competing risk regression models            | Page 10 |
| <b>Supplemental Table 8:</b> Two-way additive interaction of alcohol consumption, PRS and diabetes – competing risk regression models      | Page 11 |
| <b>Supplemental analyses using imputed data</b>                                                                                            |         |
| <b>Supplemental Table 9:</b> Risk of advanced ARLD with alcohol consumption and PRS using imputed data                                     | Page 12 |
| <b>Supplemental Table 10:</b> Risk of ARC by alcohol consumption and PRS using imputed data                                                | Page 13 |
| <b>Supplemental Table 11:</b> Risk of ARC by diabetes and (a) alcohol consumption and (b) PRS using imputed data                           | Page 14 |
| <b>Supplemental Table 12:</b> Two-way additive interaction of alcohol consumption, PRS and diabetes using imputed data                     | Page 15 |
| <b>Supplemental Table 13:</b> Three-way additive interaction of alcohol consumption, PRS and diabetes using imputed data                   | Page 16 |
| <b>Replication analyses in the China Kadoorie Biobank (CKB) cohort</b>                                                                     |         |
| <b>Supplemental Table 14a:</b> Baseline characteristics of male, current weekly drinkers in CKB by disease status                          | Page 17 |
| <b>Supplemental Table 14b:</b> Baseline characteristics of male, current weekly drinkers in CKB by alcohol consumption group               | Page 18 |
| <b>Supplemental Table 15:</b> Risk of advanced ARLD with alcohol consumption – replication analyses in CKB                                 | Page 20 |
| <b>Supplemental Table 16:</b> Risk of ARC by diabetes and alcohol consumption – replication analyses in CKB                                | Page 21 |
| <b>Supplemental Table 17:</b> Two-way additive interaction of alcohol consumption and diabetes – replication analyses in CKB               | Page 21 |
| <b>Supplemental Table 18:</b> Risk of advanced ARLD with per 1 SD increase in PRS in CKB                                                   | Page 22 |
| <b>Cross-validation analyses using UKB sub-samples</b>                                                                                     |         |
| <b>Supplemental Table 19:</b> Risk of advanced ARLD with alcohol consumption and PRS – cross-validation using sub-samples                  | Page 23 |
| <b>Supplemental Table 20:</b> Risk of ARC by alcohol consumption and PRS – cross-validation using sub-samples                              | Page 24 |
| <b>Supplemental Table 21:</b> Risk of ARC by diabetes and (a) alcohol consumption and (b) PRS – cross-validation using sub-samples         | Page 25 |
| <b>Supplemental Table 22:</b> Two-way additive interaction of alcohol consumption, PRS and diabetes – cross-validation using sub-samples   | Page 26 |
| <b>Supplemental Table 23:</b> Three-way additive interaction of alcohol consumption, PRS and diabetes – cross-validation using sub-samples | Page 27 |

## Supplemental analyses

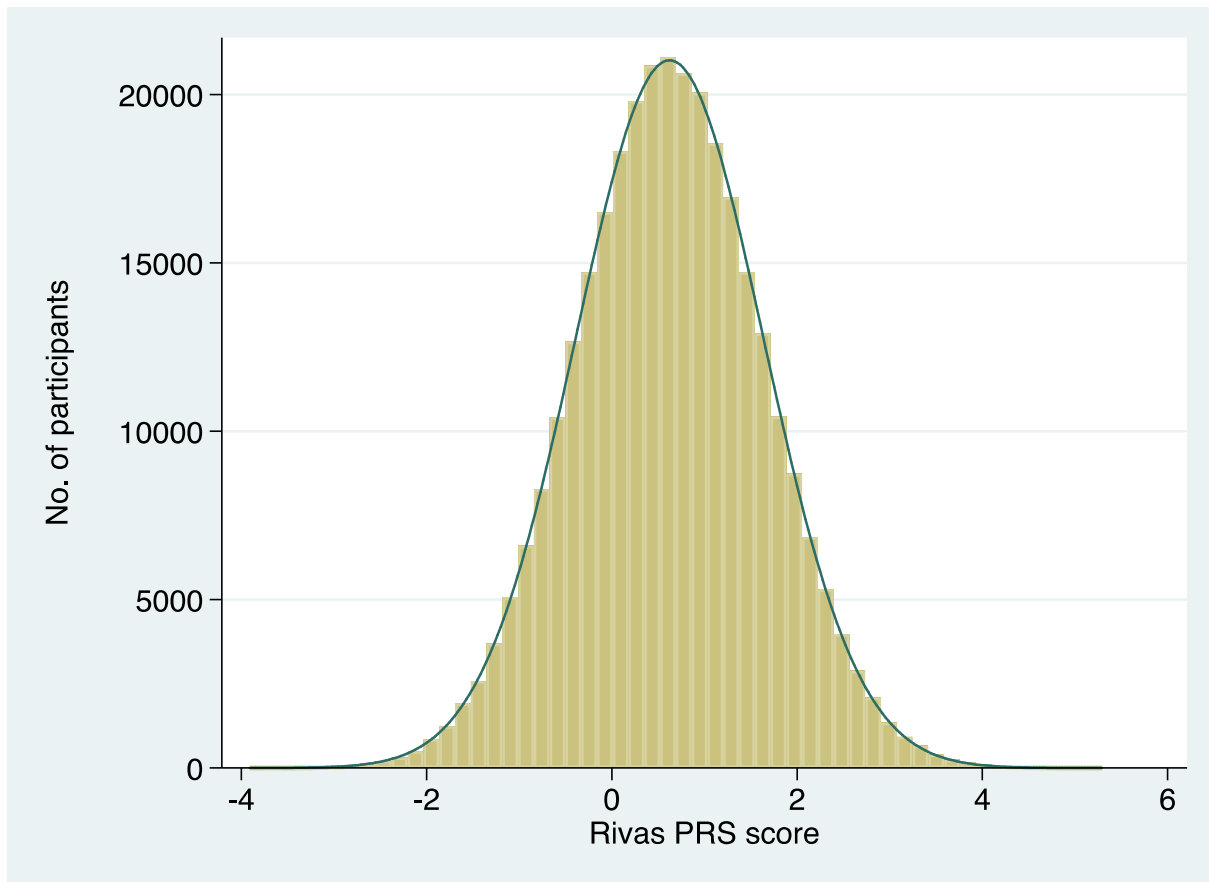

**Supplemental Figure 1:** Distribution of polygenic risk score (from Sinnott-Armstrong et al<sup>25</sup>.) for alcohol-related liver disease

**Supplemental Table 1: Baseline characteristics in UK Biobank study by alcohol consumption group\***

|                                 | <b>Total<br/>(N=312599)</b> | <b>Within daily limit<br/>(n=61742)</b> | <b>Above daily limit but<br/>below binge<br/>(n=132012)</b> | <b>Binge<br/>(n=71529)</b> | <b>Heavy Binge<br/>(n=47316)</b> | <b>p value<br/>****</b> |
|---------------------------------|-----------------------------|-----------------------------------------|-------------------------------------------------------------|----------------------------|----------------------------------|-------------------------|
| Age, years **                   | 69.4 (8.0)                  | 71.0 (7.8)                              | 69.7 (7.9)                                                  | 68.7 (8.0)                 | 67.4 (8.0)                       | <0.001                  |
| Weekly alcohol intake, units ** | 23.4 (20.0)                 | 9.3 (5.8)                               | 18.8 (10.6)                                                 | 29.6 (16.9)                | 45.7 (31.3)                      | <0.001                  |
| Male                            | 159826 (51.1)               | 27108 (43.9)                            | 64092 (48.6)                                                | 39030 (54.6)               | 29596 (62.5)                     | <0.001                  |
| Ethnicity, white                | 294816 (94.3)               | 57227 (92.7)                            | 124275 (94.1)                                               | 68078 (95.2)               | 45236 (95.6)                     | <0.001                  |
| Smoking status                  |                             |                                         |                                                             |                            |                                  |                         |
| Never                           | 162688 (52.0)               | 38219 (61.9)                            | 72294 (54.8)                                                | 33456 (46.8)               | 18719 (39.6)                     |                         |
| Ex-smoker                       | 119065 (38.1)               | 19921 (32.3)                            | 49534 (37.5)                                                | 29710 (41.5)               | 19900 (42.1)                     |                         |
| Current smoker                  | 30846 (9.9)                 | 3602 (5.8)                              | 10184 (7.7)                                                 | 8363 (11.7)                | 8697 (18.4)                      | <0.001                  |
| Physical activity ***           |                             |                                         |                                                             |                            |                                  |                         |
| None                            | 108143 (34.6)               | 22590 (36.6)                            | 44416 (33.6)                                                | 24379 (34.1)               | 16758 (35.4)                     |                         |
| 1-2 days                        | 98897 (31.6)                | 20557 (33.3)                            | 43811 (33.2)                                                | 21828 (30.5)               | 12701 (26.8)                     |                         |
| 3+ days                         | 105559 (33.8)               | 18595 (30.1)                            | 43785 (33.2)                                                | 25322 (35.4)               | 17857 (37.7)                     | <0.001                  |
| Frequency of drinking           |                             |                                         |                                                             |                            |                                  |                         |
| Daily or almost daily           | 92532 (29.6)                | 21356 (34.6)                            | 40799 (30.9)                                                | 19671 (27.5)               | 10706 (22.6)                     |                         |
| 3-4 times a week                | 105170 (33.6)               | 18127 (29.4)                            | 49923 (37.8)                                                | 24403 (34.1)               | 12717 (26.9)                     |                         |
| 1-3 times a week                | 114897 (36.8)               | 22259 (36.1)                            | 41290 (31.3)                                                | 27455 (38.4)               | 23893 (50.5)                     | <0.001                  |
| Alcohol type                    |                             |                                         |                                                             |                            |                                  |                         |
| Mixed                           | 161900 (51.8)               | 33464 (54.2)                            | 69444 (52.6)                                                | 36672 (51.3)               | 22320 (47.2)                     |                         |
| Wine only                       | 8497 (2.7)                  | 2041 (3.3)                              | 3882 (2.9)                                                  | 1835 (2.6)                 | 739 (1.6)                        |                         |
| Beer only                       | 93289 (29.8)                | 13553 (22.0)                            | 37159 (28.1)                                                | 23705 (33.1)               | 18872 (39.9)                     |                         |
| Spirits only                    | 48913 (15.6)                | 12684 (20.5)                            | 21527 (16.3)                                                | 9317 (13.0)                | 5385 (11.4)                      | <0.001                  |
| Drinking with meals             |                             |                                         |                                                             |                            |                                  |                         |
| Not with meals                  | 63648 (20.4)                | 11330 (18.4)                            | 20774 (15.7)                                                | 16121 (22.5)               | 15423 (32.6)                     |                         |
| With meals                      | 136797 (43.8)               | 34485 (55.9)                            | 64887 (49.2)                                                | 26203 (36.6)               | 11222 (23.7)                     |                         |
| It varies                       | 112154 (35.9)               | 15927 (25.8)                            | 46351 (35.1)                                                | 29205 (40.8)               | 20671 (43.7)                     | <0.001                  |
| PRS Score                       |                             |                                         |                                                             |                            |                                  |                         |
| Low                             | 63549 (20.3)                | 13376 (21.7)                            | 27543 (20.9)                                                | 14139 (19.8)               | 8491 (17.9)                      |                         |
| Middle                          | 188524 (60.3)               | 37176 (60.2)                            | 79613 (60.3)                                                | 43083 (60.2)               | 28652 (60.6)                     |                         |
| High                            | 60526 (19.4)                | 11190 (18.1)                            | 24856 (18.8)                                                | 14307 (20.0)               | 10173 (21.5)                     | <0.001                  |
| BMI, kg/m2                      |                             |                                         |                                                             |                            |                                  |                         |
| <18.5                           | 1367 (0.4)                  | 457 (0.7)                               | 578 (0.4)                                                   | 203 (0.3)                  | 129 (0.3)                        |                         |
| 18.5-24.9                       | 107985 (34.5)               | 25820 (41.8)                            | 49111 (37.2)                                                | 21624 (30.2)               | 11430 (24.2)                     |                         |
| 25-29.9                         | 138404 (44.3)               | 25349 (41.1)                            | 58173 (44.1)                                                | 33182 (46.4)               | 21700 (45.9)                     |                         |
| ≥30                             | 64843 (20.7)                | 10116 (16.4)                            | 24150 (18.3)                                                | 16520 (23.1)               | 14057 (29.7)                     | <0.001                  |

|                    |             |            |            |            |            |        |
|--------------------|-------------|------------|------------|------------|------------|--------|
| Prevalent diabetes | 11842 (3.8) | 2280 (3.7) | 4622 (3.5) | 2810 (3.9) | 2130 (4.5) | <0.001 |
| Advanced ARLD      | 782 (0.3)   | 48 (0.1)   | 161 (0.1)  | 209 (0.3)  | 364 (0.8)  | <0.001 |
| ARC                | 734 (0.2)   | 47 (0.1)   | 151 (0.1)  | 194 (0.3)  | 342 (0.7)  | <0.001 |
| AH                 | 136 (0.04)  | 4 (0.01)   | 23 (0.02)  | 36 (0.05)  | 73 (0.15)  | <0.001 |

Values are numbers (percentages) unless otherwise indicated

\* Based on average daily alcohol consumption: within daily limit (<24g for women, <32g for men), above daily limit but below binge (24-48g for women, 32-64g for men), binge (48-72g for women, 64-96g for men) and heavy binge (>=72g for women, >=96g for men)

\*\* Mean (standard deviation)

\*\*\* Physical activity based on the number of days engaged in vigorous activity for 10 minutes or more

\*\*\*\* Two-sided p values from one-way ANOVA or chi-square test (Fisher's exact test for cells with <5 observations) to compare the differences across binge groups

**Supplemental Table 2: Hazard ratios and 95% confidence intervals for risk of advanced ARLD associated with polygenic risk**

|                               | Participants (N) | ARC       |      |              |         | AH        |      |              |         |
|-------------------------------|------------------|-----------|------|--------------|---------|-----------|------|--------------|---------|
|                               |                  | Cases (n) | HR   | 95% CI       | p value | Cases (n) | HR   | 95% CI       | p value |
| Polygenic risk score category |                  |           |      |              |         |           |      |              |         |
| Low group                     | 63,549           | 71        | Ref  |              |         | 20        | Ref  |              |         |
| Middle group                  | 188,524          | 373       | 1.60 | (1.24, 2.07) | <0.001  | 77        | 1.13 | (0.69, 1.86) | 0.622   |
| High group                    | 60,526           | 290       | 3.51 | (2.70, 4.55) | <0.001  | 39        | 1.60 | (0.93, 2.76) | 0.088   |
| Polygenic risk score per SD * | 312,599          | 734       | 1.67 | (1.55, 1.80) | <0.001  | 136       | 1.32 | (1.12, 1.57) | <0.001  |

HRs were derived from Cox regression with adjustment for sex, age, ethnicity, Townsend deprivation index at recruitment, physical activity, smoking, total weekly alcohol intake, beverage type, drinking with/without meal, daily alcohol consumption group, diabetes, BMI, first 10 principal genetic components, and genotyping array; p values were calculated using the two-sided Wald test

\* One SD corresponded to 1.015

**Supplemental Table 3: Two-way additive interaction between alcohol consumption and PRS group**

|                                              | Participants<br>(N) | ARC cases<br>(n) | RERI        | 95% CI               | p value       | AP          | 95% CI              | p value           | S     | 95% CI        | p value |
|----------------------------------------------|---------------------|------------------|-------------|----------------------|---------------|-------------|---------------------|-------------------|-------|---------------|---------|
| Above daily limit but below binge # Mid PRS  | 79613               | 70               | -0.34       | (-1.73, 1.05)        | 0.632         | -0.38       | (-1.70, 0.94)       | 0.571             | -0.47 | (-8.28, 7.33) | 0.711   |
| Above daily limit but below binge # High PRS | 24856               | 62               | -1.31       | (-4.09, 1.46)        | 0.354         | -0.56       | (-1.55, 0.43)       | 0.265             | 0.51  | (0.05, 0.96)  | 0.033   |
| Binge # Mid PRS                              | 43083               | 106              | -0.00       | (-1.18, 1.17)        | 0.994         | -0.00       | (-0.98, 0.98)       | 0.994             | 0.98  | (-4.68, 6.63) | 0.994   |
| Binge # High PRS                             | 14307               | 70               | -1.67       | (-5.04, 1.70)        | 0.332         | -0.58       | (-1.61, 0.45)       | 0.270             | 0.53  | (0.06, 1.00)  | 0.049   |
| Heavy binge # Mid PRS                        | 28652               | 175              | 2.26        | (-0.08, 4.60)        | 0.058         | <b>0.32</b> | <b>(0.03, 0.61)</b> | <b>†0.029</b>     | 1.60  | (0.68, 2.51)  | 0.200   |
| Heavy binge # High PRS                       | 10173               | 138              | <b>6.07</b> | <b>(0.20, 11.94)</b> | <b>†0.043</b> | <b>0.47</b> | <b>(0.25, 0.70)</b> | <b>†&lt;0.001</b> | 2.06  | (1.00, 3.12)  | 0.050   |

Based on hazard ratio estimates derived from Cox regression with adjustment for total weekly alcohol intake, BMI, diabetes, sex, age, ethnicity, Townsend deprivation index, physical activity, smoke, alcohol type, drinking with/without meals, genotyping array, first 10 ancestry principal components; p values were calculated using the two-sided Wald test

†RERI>0, AP>0 or S>1 indicates significant additive interaction

**Supplemental Table 4: Two-way additive interaction of diabetes with alcohol consumption and PRS group**

|                                                | Participants<br>(N) | ARC cases<br>(n) | RERI        | 95% CI              | p value       | AP          | 95% CI              | p value           | S    | 95% CI        | p value |
|------------------------------------------------|---------------------|------------------|-------------|---------------------|---------------|-------------|---------------------|-------------------|------|---------------|---------|
| Diabetes # Above daily limit but below binge * | 4622                | 21               | -0.69       | (-2.85, 1.48)       | 0.533         | -0.43       | (-1.86, 0.99)       | 0.548             | 0.46 | (-0.46, 1.38) | 0.247   |
| Diabetes # Binge *                             | 2810                | 27               | -0.63       | (-3.11, 1.85)       | 0.619         | -0.30       | (-1.53, 0.92)       | 0.631             | 0.63 | (-0.36, 1.62) | 0.470   |
| Diabetes # Heavy binge *                       | 2130                | 48               | <b>4.69</b> | <b>(0.50, 8.88)</b> | <b>†0.028</b> | <b>0.43</b> | <b>(0.16, 0.71)</b> | <b>†0.002</b>     | 1.92 | (0.84, 3.00)  | 0.096   |
| Diabetes # Mid PRS **                          | 7080                | 48               | 0.79        | (-1.24, 2.81)       | 0.448         | 0.20        | (-0.29, 0.69)       | 0.424             | 1.36 | (0.17, 2.56)  | 0.552   |
| Diabetes # High PRS **                         | 2600                | 46               | <b>4.83</b> | <b>(0.99, 8.67)</b> | <b>†0.014</b> | <b>0.46</b> | <b>(0.21, 0.70)</b> | <b>†&lt;0.001</b> | 2.02 | (0.95, 3.10)  | 0.063   |

Based on hazard ratio estimates derived from Cox regression, with two-sided p values computed using the Wald test

\*Adjusted for total weekly alcohol intake, BMI, sex, age, ethnicity, Townsend deprivation index, physical activity, smoke, alcohol type, drinking with/without meals, PRS group, genotyping array, first 10 ancestry principal components

\*\*Adjusted for total weekly alcohol intake, daily alcohol consumption group, BMI, sex, age, ethnicity, Townsend deprivation index, physical activity, smoke, alcohol type, drinking with/without meals, genotyping array, first 10 ancestry principal components

†RERI>0, AP>0 or S>1 indicates significant additive interaction

## Analyses using competing risk regression models

**Supplemental Table 5: Hazard ratios for risk of advanced ARLD associated with alcohol consumption and polygenic risk – competing risk regression models (N=312,599)**

|                                   | ARC (n=734) |              |         | AH (n=136) |               |         |
|-----------------------------------|-------------|--------------|---------|------------|---------------|---------|
|                                   | HR          | 95% CI       | p value | HR         | 95% CI        | p value |
| Alcohol consumption group *       |             |              |         |            |               |         |
| Below daily limit                 | Ref         |              |         |            |               |         |
| Above daily limit but below binge | 1.33        | (0.95, 1.85) | 0.095   | 2.38       | (0.82, 6.90)  | 0.110   |
| Binge                             | 2.34        | (1.69, 3.26) | <0.001  | 5.11       | (1.82, 14.38) | 0.002   |
| Heavy binge                       | 3.79        | (2.70, 5.31) | <0.001  | 9.23       | (3.31, 25.77) | <0.001  |
| Polygenic risk score category **  |             |              |         |            |               |         |
| Low group                         | Ref         |              |         | Ref        |               |         |
| Middle group                      | 1.60        | (1.22, 2.09) | 0.001   | 1.13       | (0.68, 1.87)  | 0.632   |
| High group                        | 3.45        | (2.63, 4.52) | <0.001  | 1.58       | (0.91, 2.74)  | 0.106   |

HRs were derived from Cox regression, with two-sided p values computed using the Wald test

\*Adjusted for sex, age, ethnicity, Townsend deprivation index at recruitment, physical activity, smoking, total weekly alcohol intake, beverage type, drinking with/without meal, diabetes, and BMI

\*\*Adjusted for sex, age, ethnicity, Townsend deprivation index at recruitment, physical activity, smoking, total weekly alcohol intake, beverage type, drinking with/without meal, daily alcohol consumption group, diabetes, BMI, first 10 principal genetic components, and genotyping array



**Supplemental Table 6: Hazard ratios for risk of alcohol-related cirrhosis by alcohol consumption and polygenic risk group – competing risk regression models (N=312,599)**

|                                   | ARC (n=734) |               |         |
|-----------------------------------|-------------|---------------|---------|
|                                   | HR          | 95% CI        | p value |
| Below daily limit                 |             |               |         |
| Low PRS                           | Ref         |               |         |
| Mid PRS                           | 1.52        | (0.58, 4.02)  | 0.398   |
| High PRS                          | 4.31        | (1.61, 11.53) | 0.004   |
| Above daily limit but below binge |             |               |         |
| Low PRS                           | 1.60        | (0.59, 4.30)  | 0.353   |
| Mid PRS                           | 1.96        | (0.79, 4.87)  | 0.149   |
| High PRS                          | 5.18        | (2.07, 12.95) | <0.001  |
| Binge                             |             |               |         |
| Low PRS                           | 2.19        | (0.81, 5.96)  | 0.124   |
| Mid PRS                           | 4.04        | (1.63, 10.02) | 0.003   |
| High PRS                          | 7.30        | (2.91, 18.30) | <0.001  |
| Heavy binge                       |             |               |         |
| Low PRS                           | 3.47        | (1.29, 9.35)  | 0.014   |
| Mid PRS                           | 5.86        | (2.36, 14.56) | <0.001  |
| High PRS                          | 12.41       | (4.96, 31.05) | <0.001  |

HRs were derived from Cox regression with adjustment for total weekly alcohol intake, diabetes, BMI, sex, age, ethnicity, Townsend deprivation index, physical activity, smoke, alcohol type, drinking with/without meals, genotyping array, and first 10 ancestry principal components; p values were calculated using the two-sided Wald test  $p=0.653$  for multiplicative interaction, assessed through a two-sided likelihood ratio test comparing models with and without interaction terms, between alcohol consumption and polygenic risk group

**Supplemental Table 7: Hazard ratios for risk of alcohol-related cirrhosis by diabetes and (a) alcohol consumption and (b) polygenic risk – competing risk regression models (N=312,599)**

|                                   |                  | ARC (n=734) |               |         |
|-----------------------------------|------------------|-------------|---------------|---------|
|                                   |                  | HR          | 95% CI        | p value |
| <b>(a) Alcohol consumption*</b>   |                  |             |               |         |
| Below daily limit                 |                  |             |               |         |
|                                   | Without diabetes | Ref         |               |         |
|                                   | With diabetes    | 2.67        | (1.18, 6.01)  | 0.018   |
| Above daily limit but below binge |                  |             |               |         |
|                                   | Without diabetes | 1.29        | (0.90, 1.85)  | 0.161   |
|                                   | With diabetes    | 3.30        | (1.93, 5.64)  | <0.001  |
| Binge                             |                  |             |               |         |
|                                   | Without diabetes | 2.21        | (1.55, 3.16)  | <0.001  |
|                                   | With diabetes    | 5.43        | (3.31, 8.92)  | <0.001  |
| Heavy binge                       |                  |             |               |         |
|                                   | Without diabetes | 3.43        | (2.38, 4.95)  | <0.001  |
|                                   | With diabetes    | 8.53        | (5.43, 13.38) | <0.001  |
| <b>(b) Genetic risk**</b>         |                  |             |               |         |
| Low PRS                           |                  |             |               |         |
|                                   | Without diabetes | Ref         |               |         |
|                                   | With diabetes    | 2.56        | (1.26, 5.17)  | 0.009   |
| Mid PRS                           |                  |             |               |         |
|                                   | Without diabetes | 1.61        | (1.21, 2.15)  | 0.001   |
|                                   | With diabetes    | 3.86        | (2.59, 5.75)  | <0.001  |
| High PRS                          |                  |             |               |         |
|                                   | Without diabetes | 3.44        | (2.57, 4.61)  | <0.001  |
|                                   | With diabetes    | 8.96        | (5.98, 13.43) | <0.001  |

HRs were derived from Cox regression, with two-sided p values computed using the Wald test

\*Adjusted for sex, age, ethnicity, Townsend deprivation index at recruitment, physical activity, smoking, total weekly alcohol intake, beverage type, drinking with/without meal, BMI, PRS group, genotyping array, and first 10 ancestry principal components

p=0.998 for multiplicative interaction, assessed through a two-sided likelihood ratio test comparing models with and without interaction terms, between diabetes and alcohol consumption

\*\*Adjusted for sex, age, ethnicity, Townsend deprivation index at recruitment, physical activity, smoking, total weekly alcohol intake, beverage type, drinking with/without meal, BMI, alcohol consumption group, genotyping array, and first 10 ancestry principal components

p=0.934 for multiplicative interaction, assessed through a two-sided likelihood ratio test comparing models with and without interaction terms, between diabetes and polygenic risk

**Supplemental Table 8: Two-way additive interaction of alcohol consumption, PRS group and diabetes – competing risk regression models (N=312,599)**

|                                                 | ARC (n=734) |                     |               |             |                     |                   |       |                |         |
|-------------------------------------------------|-------------|---------------------|---------------|-------------|---------------------|-------------------|-------|----------------|---------|
|                                                 | RERI        | 95% CI              | p value       | AP          | 95% CI              | p value           | S     | 95% CI         | p value |
| Above daily limit but below binge # Mid PRS *   | -0.34       | (-1.72, 1.05)       | 0.632         | -0.39       | (-1.71, 0.94)       | 0.567             | -0.58 | (-10.08, 8.92) | 0.745   |
| Above daily limit but below binge # High PRS *  | -1.27       | (-4.00, 1.46)       | 0.363         | -0.55       | (-1.52, 0.42)       | 0.271             | 0.51  | (0.05, 0.97)   | 0.036   |
| Binge # Mid PRS *                               | -0.01       | (-1.16, 1.15)       | 0.989         | -0.01       | (-0.99, 0.97)       | 0.989             | 0.96  | (-4.97, 6.88)  | 0.989   |
| Binge # High PRS *                              | -1.65       | (-4.95, 1.66)       | 0.329         | -0.58       | (-1.58, 0.41)       | 0.248             | 0.52  | (0.08, 0.97)   | 0.036   |
| Heavy binge # Mid PRS *                         | 2.19        | (-0.14, 4.51)       | 0.065         | <b>0.32</b> | <b>(0.03, 0.61)</b> | <b>†0.032</b>     | 1.60  | (0.66, 2.53)   | 0.211   |
| Heavy binge # High PRS *                        | 5.81        | (-0.45, 12.07)      | 0.069         | <b>0.47</b> | <b>(0.22, 0.71)</b> | <b>†&lt;0.001</b> | 2.03  | (0.92, 3.14)   | 0.070   |
| Diabetes # Above daily limit but below binge ** | -0.61       | (-2.68, 1.46)       | 0.564         | -0.40       | (-1.81, 1.01)       | 0.575             | 0.45  | (-0.52, 1.43)  | 0.272   |
| Diabetes # Binge **                             | -0.61       | (-3.07, 1.84)       | 0.624         | -0.31       | (-1.58, 0.96)       | 0.634             | 0.62  | (-0.40, 1.63)  | 0.460   |
| Diabetes # Heavy binge **                       | <b>4.23</b> | <b>(0.19, 8.27)</b> | <b>†0.040</b> | <b>0.42</b> | <b>(0.13, 0.70)</b> | <b>†0.004</b>     | 1.86  | (0.80, 2.92)   | 0.113   |
| Diabetes # Mid PRS ***                          | 0.67        | (-1.28, 2.62)       | 0.499         | 0.18        | (-0.32, 0.67)       | 0.479             | 1.32  | (0.16, 2.48)   | 0.588   |
| Diabetes # High PRS ***                         | <b>4.33</b> | <b>(0.65, 8.01)</b> | <b>†0.021</b> | <b>0.44</b> | <b>(0.18, 0.69)</b> | <b>†0.001</b>     | 1.94  | (0.91, 2.97)   | 0.073   |

Based on hazard ratio estimates derived from Cox regression, with two-sided p values computed using the Wald test

\*Adjusted for total weekly alcohol intake, BMI, diabetes, sex, age, ethnicity, Townsend deprivation index, physical activity, smoke, alcohol type, drinking with/without meals, genotyping array, first 10 ancestry principal components

\*\*Adjusted for total weekly alcohol intake, BMI, sex, age, ethnicity, Townsend deprivation index, physical activity, smoke, alcohol type, drinking with/without meals, PRS group, genotyping array, first 10 ancestry principal components

\*\*\*Adjusted for total weekly alcohol intake, daily alcohol consumption group, BMI, sex, age, ethnicity, Townsend deprivation index, physical activity, smoke, alcohol type, drinking with/without meals, genotyping array, first 10 ancestry principal components

†RERI>0, AP>0 or S>1 indicates significant additive interaction

## Supplemental analyses using imputed data

**Supplemental Table 9: Hazard ratios for risk of advanced ARLD associated with alcohol consumption and polygenic risk using imputed data (N=342,541)**

|                                   | ARC (n=873) |              |         | AH (n=163) |               |         |
|-----------------------------------|-------------|--------------|---------|------------|---------------|---------|
|                                   | HR          | 95% CI       | p value | HR         | 95% CI        | p value |
| Alcohol consumption group *       |             |              |         |            |               |         |
| Below daily limit                 | Ref         |              |         | Ref        |               |         |
| Above daily limit but below binge | 1.24        | (0.93, 1.66) | 0.144   | 1.91       | (0.79, 4.61)  | 0.153   |
| Binge                             | 2.03        | (1.52, 2.72) | <0.001  | 3.66       | (1.53, 8.73)  | 0.004   |
| Heavy binge                       | 3.30        | (2.48, 4.39) | <0.001  | 6.22       | (2.63, 14.70) | <0.001  |
| Polygenic risk score category **  |             |              |         |            |               |         |
| Low group                         | Ref         |              |         | Ref        |               |         |
| Middle group                      | 1.59        | (1.25, 2.01) | <0.001  | 1.25       | (0.78, 2.01)  | 0.360   |
| High group                        | 3.69        | (2.89, 4.72) | <0.001  | 1.92       | (1.14, 3.22)  | 0.014   |

HRs were derived from Cox regression, with two-sided p values computed using the Wald test

\*Adjusted for sex, age, ethnicity, Townsend deprivation index at recruitment, physical activity, smoking, total weekly alcohol intake, beverage type, drinking with/without meal, diabetes, and BMI

\*\*Adjusted for sex, age, ethnicity, Townsend deprivation index at recruitment, physical activity, smoking, total weekly alcohol intake, beverage type, drinking with/without meal, daily alcohol consumption group, diabetes, BMI, first 10 principal genetic components, and genotyping array

**Supplemental Table 10: Hazard ratios for risk of alcohol-related cirrhosis by alcohol consumption and polygenic risk group using imputed data (N=342,541)**

|                                   | ARC (n=873) |               |         |
|-----------------------------------|-------------|---------------|---------|
|                                   | HR          | 95% CI        | p value |
| Below daily limit                 |             |               |         |
| Low PRS                           | Ref         |               |         |
| Mid PRS                           | 1.61        | (0.67, 3.87)  | 0.289   |
| High PRS                          | 4.45        | (1.82, 10.86) | 0.001   |
| Above daily limit but below binge |             |               |         |
| Low PRS                           | 1.30        | (0.52, 3.23)  | 0.579   |
| Mid PRS                           | 1.93        | (0.85, 4.37)  | 0.118   |
| High PRS                          | 5.23        | (2.29, 11.97) | <0.001  |
| Binge                             |             |               |         |
| Low PRS                           | 2.11        | (0.85, 5.20)  | 0.106   |
| Mid PRS                           | 3.48        | (1.53, 7.93)  | 0.003   |
| High PRS                          | 6.95        | (3.05, 15.84) | <0.001  |
| Heavy binge                       |             |               |         |
| Low PRS                           | 3.19        | (1.33, 7.64)  | 0.009   |
| Mid PRS                           | 5.09        | (2.26, 11.49) | <0.001  |
| High PRS                          | 11.67       | (5.14, 26.46) | <0.001  |

HRs were derived from Cox regression with adjustment for total weekly alcohol intake, diabetes, BMI, sex, age, ethnicity, Townsend deprivation index, physical activity, smoke, alcohol type, drinking with/without meals, genotyping array, and first 10 ancestry principal components; p values were calculated using the two-sided Wald test  $p=0.873$  for multiplicative interaction, assessed through a two-sided likelihood ratio test comparing models with and without interaction terms, between alcohol consumption and polygenic risk group

**Supplemental Table 11: Hazard ratios for risk of alcohol-related cirrhosis by diabetes and (a) alcohol consumption and (b) polygenic risk using imputed data (N=342,541)**

|                                   | ARC (n=873) |               |         |
|-----------------------------------|-------------|---------------|---------|
|                                   | HR          | 95% CI        | p value |
| <b>(a) Alcohol consumption*</b>   |             |               |         |
| Below daily limit                 |             |               |         |
| Without diabetes                  | Ref         |               |         |
| With diabetes                     | 2.21        | (1.05, 4.66)  | 0.038   |
| Above daily limit but below binge |             |               |         |
| Without diabetes                  | 1.18        | (0.86, 1.61)  | 0.305   |
| With diabetes                     | 2.99        | (1.85, 4.82)  | <0.001  |
| Binge                             |             |               |         |
| Without diabetes                  | 1.90        | (1.39, 2.59)  | <0.001  |
| With diabetes                     | 4.19        | (2.63, 6.67)  | <0.001  |
| Heavy binge                       |             |               |         |
| Without diabetes                  | 2.92        | (2.15, 3.98)  | <0.001  |
| With diabetes                     | 6.70        | (4.49, 9.98)  | <0.001  |
| <b>(b) Genetic risk**</b>         |             |               |         |
| Low PRS                           |             |               |         |
| Without diabetes                  | Ref         |               |         |
| With diabetes                     | 2.18        | (1.08, 4.37)  | 0.029   |
| Mid PRS                           |             |               |         |
| Without diabetes                  | 1.59        | (1.24, 2.05)  | <0.001  |
| With diabetes                     | 3.41        | (2.36, 4.92)  | <0.001  |
| High PRS                          |             |               |         |
| Without diabetes                  | 3.62        | (2.79, 4.69)  | <0.001  |
| With diabetes                     | 9.14        | (6.37, 13.11) | <0.001  |

HRs were derived from Cox regression, with two-sided p values computed using the Wald test

\*Adjusted for sex, age, ethnicity, Townsend deprivation index at recruitment, physical activity, smoking, total weekly alcohol intake, beverage type, drinking with/without meal, BMI, PRS group, genotyping array, and first 10 ancestry principal components

p=0.969 for multiplicative interaction, assessed through a two-sided likelihood ratio test comparing models with and without interaction terms, between diabetes and alcohol consumption

\*\*Adjusted for sex, age, ethnicity, Townsend deprivation index at recruitment, physical activity, smoking, total weekly alcohol intake, beverage type, drinking with/without meal, BMI, alcohol consumption group, genotyping array, and first 10 ancestry principal components

p=0.725 for multiplicative interaction, assessed through a two-sided likelihood ratio test comparing models with and without interaction terms, between diabetes and polygenic risk

**Supplemental Table 12: Two-way additive interaction of alcohol consumption, PRS group and diabetes using imputed data (N=342,541)**

|                                                 | ARC (n=873) |                      |               |             |                     |                   |             |                     |               |
|-------------------------------------------------|-------------|----------------------|---------------|-------------|---------------------|-------------------|-------------|---------------------|---------------|
|                                                 | RERI        | 95% CI               | p value       | AP          | 95% CI              | p value           | S           | 95% CI              | p value       |
| Above daily limit but below binge # Mid PRS *   | -0.40       | (-1.73, 0.93)        | 0.554         | -0.42       | (-1.57, 0.73)       | 0.477             | -0.11       | (-2.95, 2.74)       | 0.446         |
| Above daily limit but below binge # High PRS *  | -1.08       | (-3.51, 1.34)        | 0.381         | -0.42       | (-1.23, 0.39)       | 0.310             | 0.59        | (0.13, 1.06)        | 0.085         |
| Binge # Mid PRS *                               | -0.34       | (-1.65, 0.97)        | 0.609         | -0.29       | (-1.24, 0.66)       | 0.554             | 0.35        | (-0.62, 1.32)       | 0.190         |
| Binge # High PRS *                              | -1.93       | (-5.07, 1.21)        | 0.228         | -0.73       | (-1.73, 0.26)       | 0.147             | 0.46        | (0.09, 0.82)        | 0.004         |
| Heavy binge # Mid PRS *                         | 1.87        | (-0.03, 3.77)        | 0.054         | <b>0.29</b> | <b>(0.01, 0.57)</b> | <b>†0.039</b>     | 1.53        | (0.70, 2.36)        | 0.208         |
| Heavy binge # High PRS *                        | <b>6.09</b> | <b>(0.74, 11.43)</b> | <b>†0.026</b> | <b>0.48</b> | <b>(0.28, 0.68)</b> | <b>†&lt;0.001</b> | <b>2.08</b> | <b>(1.09, 3.07)</b> | <b>†0.032</b> |
| Diabetes # Above daily limit but below binge ** | -0.33       | (-2.01, 1.36)        | 0.704         | -0.22       | (-1.38, 0.94)       | 0.710             | 0.60        | (-0.76, 1.96)       | 0.560         |
| Diabetes # Binge **                             | -0.45       | (-2.41, 1.50)        | 0.649         | -0.26       | (-1.39, 0.88)       | 0.658             | 0.63        | (-0.46, 1.72)       | 0.505         |
| Diabetes # Heavy binge **                       | <b>3.16</b> | <b>(0.23, 6.09)</b>  | <b>†0.034</b> | <b>0.39</b> | <b>(0.12, 0.66)</b> | <b>†0.005</b>     | 1.81        | (0.82, 2.80)        | 0.109         |
| Diabetes # Mid PRS ***                          | 0.61        | (-1.07, 2.28)        | 0.477         | 0.18        | (-0.30, 0.66)       | 0.457             | 1.35        | (0.12, 2.58)        | 0.576         |
| Diabetes # High PRS ***                         | <b>4.66</b> | <b>(1.28, 8.04)</b>  | <b>†0.007</b> | <b>0.46</b> | <b>(0.24, 0.69)</b> | <b>†&lt;0.001</b> | <b>2.05</b> | <b>(1.04, 3.07)</b> | <b>†0.041</b> |

Based on hazard ratio estimates derived from Cox regression, with two-sided p values computed using the Wald test

\*Adjusted for total weekly alcohol intake, BMI, diabetes, sex, age, ethnicity, Townsend deprivation index, physical activity, smoke, alcohol type, drinking with/without meals, genotyping array, first 10 ancestry principal components

\*\*Adjusted for total weekly alcohol intake, BMI, sex, age, ethnicity, Townsend deprivation index, physical activity, smoke, alcohol type, drinking with/without meals, PRS group, genotyping array, first 10 ancestry principal components

\*\*\*Adjusted for total weekly alcohol intake, daily alcohol consumption group, BMI, sex, age, ethnicity, Townsend deprivation index, physical activity, smoke, alcohol type, drinking with/without meals, genotyping array, first 10 ancestry principal components

†RERI>0, AP>0 or S>1 indicates significant additive interaction

**Supplemental Table 13: Three-way additive interaction of alcohol consumption, PRS group and diabetes using imputed data (N=342,541)**

|                                            | ARC (n=873)                             |                      |                   |
|--------------------------------------------|-----------------------------------------|----------------------|-------------------|
|                                            | HR                                      | 95% CI               | p value           |
| Below daily limit # Low PRS # No diabetes  | Ref                                     |                      |                   |
| Heavy binge # Low PRS # No diabetes        | 2.78                                    | (1.15, 6.74)         | 0.023             |
| Below daily limit # High PRS # No diabetes | 3.71                                    | (1.48, 9.27)         | 0.005             |
| Below daily limit # Low PRS # Diabetes     | 1.78                                    | (0.01, 14.87)        | 0.716             |
| Heavy binge # High PRS # Diabetes          | 21.62                                   | (8.71, 53.64)        | <0.001            |
|                                            | <b>Total RERI</b>                       | <b>95% CI</b>        | <b>p value</b>    |
| Heavy binge # High PRS # Diabetes          | <i>20.37</i>                            | <i>(1.38, 39.36)</i> | <i>†0.036</i>     |
|                                            | <b>AP</b>                               | <b>95% CI</b>        | <b>p value</b>    |
| Heavy binge # High PRS # Diabetes          | <i>0.82</i>                             | <i>(0.69, 0.95)</i>  | <i>†&lt;0.001</i> |
|                                            | <b>S</b>                                | <b>95% CI</b>        | <b>p value</b>    |
| Heavy binge # High PRS # Diabetes          | 6.97                                    | (0.02, 13.92)        | 0.092             |
|                                            | <b>RERI beyond two-way interactions</b> | <b>95% CI</b>        | <b>p value</b>    |
| Heavy binge # High PRS # Diabetes          | -5.57                                   | (-25.27, 14.14)      | 0.580             |

HRs were derived from Cox regression with adjustment for total weekly alcohol intake, BMI, sex, age, ethnicity, Townsend deprivation index, physical activity, smoke, alcohol type, drinking with/without meals, genotyping array, first 10 ancestry principal components  
RERI, AP, and S were computed based on HRs obtained from Cox regression with aforementioned adjustment  
All p values were calculated using the two-sided Wald test  
†RERI>0, AP>0 or S>1 indicates significant additive interaction



## Replication analyses in the CKB cohort

**Supplemental Table 14a: Baseline characteristics of 69,039 male, current weekly drinkers in the China Kadoorie Biobank by disease status**

|                                                              | <b>ARLD-free controls</b><br>(n=68,807) | <b>ARC</b><br>(n=191) | <b>AH</b><br>(n=53) |
|--------------------------------------------------------------|-----------------------------------------|-----------------------|---------------------|
| <b>Age, years*</b>                                           | 51.6 (10.2)                             | 51.8 (9.4)            | 48.3 (8.7)          |
| <b>Alcohol intake on a typical day, g per day*</b>           | 54.2 (36.9)                             | 83.8 (56.7)           | 80.4 (58.3)         |
| <b>Weekly alcohol intake, g per week*</b>                    | 284.7 (244.2)                           | 518.5 (376.4)         | 486.8 (397.8)       |
| <b>Alcohol consumption group**</b>                           |                                         |                       |                     |
| Within daily limit                                           | 22,547 (32.8%)                          | 28 (14.7%)            | 8 (15.1%)           |
| Above daily limit but below binge                            | 29,089 (42.3%)                          | 69 (36.1%)            | 19 (35.8%)          |
| Binge                                                        | 8,081 (11.7%)                           | 24 (12.6%)            | 9 (17.0%)           |
| Heavy Binge                                                  | 9,090 (13.2%)                           | 70 (36.6%)            | 17 (32.1%)          |
| <b>Smoking status</b>                                        |                                         |                       |                     |
| Never                                                        | 5,485 (8.0%)                            | 5 (2.6%)              | 2 (3.8%)            |
| Occasional or current                                        | 54,611 (79.4%)                          | 167 (87.4%)           | 47 (88.7%)          |
| Ex-regular                                                   | 8,711 (12.7%)                           | 19 (9.9%)             | 4 (7.5%)            |
| <b>Physical activity, MET-h/d***</b>                         | 22.9 (15.0)                             | 22.8 (14.2)           | 22.3 (13.7)         |
| <b>Frequency of drinking</b>                                 |                                         |                       |                     |
| 1-2 days/week                                                | 13,771 (20.0%)                          | 12 (6.3%)             | 4 (7.5%)            |
| 3-5 days/week                                                | 12,423 (18.1%)                          | 14 (7.3%)             | 6 (11.3%)           |
| Daily or almost every day                                    | 42,613 (61.9%)                          | 165 (86.4%)           | 43 (81.1%)          |
| <b>Alcohol type</b>                                          |                                         |                       |                     |
| Beer                                                         | 12,519 (18.2%)                          | 11 (5.8%)             | 7 (13.2%)           |
| Rice wine or grape wine                                      | 8,363 (12.2%)                           | 17 (8.9%)             | 3 (5.7%)            |
| Spirits                                                      | 47,925 (69.7%)                          | 163 (85.3%)           | 43 (81.1%)          |
| <b>Drinking with meals</b>                                   |                                         |                       |                     |
| Usually drink with the meal                                  | 59,138 (85.9%)                          | 140 (73.3%)           | 45 (84.9%)          |
| Usually drink between or after the meals                     | 5,754 (8.4%)                            | 7 (3.7%)              | 2 (3.8%)            |
| No regular pattern                                           | 3,915 (5.7%)                            | 44 (23.0%)            | 6 (11.3%)           |
| <b>BMI, kg/m<sup>2</sup></b>                                 |                                         |                       |                     |
| <18.5                                                        | 2,249 (3.3%)                            | 16 (8.4%)             | 2 (3.8%)            |
| 18.5-24.9                                                    | 43,401 (63.1%)                          | 143 (74.9%)           | 46 (86.8%)          |
| 25-29.9                                                      | 20,880 (30.3%)                          | 30 (15.7%)            | 5 (9.4%)            |
| 30+                                                          | 2,277 (3.3%)                            | 2 (1.0%)              | 0 (0.0%)            |
| <b>Prevalent diabetes (self-reported or screen-detected)</b> | 3,430 (5.0%)                            | 13 (6.8%)             | 4 (7.5%)            |

Values are numbers (percentages) unless otherwise indicated

\* Mean (standard deviation)

\*\* Based on average daily alcohol consumption: within daily limit (<32g for men), above daily limit but below binge (32-64g for men), binge (64-96g for men) and heavy binge (>=96g for men)

\*\*\* Physical activity calculated as metabolic equivalent task hours per day (MET-h/d)

Supplemental Table 14b: Baseline characteristics of 69,039 male, current weekly drinkers in the China Kadoorie Biobank by alcohol consumption group\*

|                                                              | Total<br>(n=69,039) | Within daily<br>limit<br>(n=22,582) | Above daily limit but<br>below binge<br>(n=29,172) | Binge<br>(n=8,113) | Heavy Binge<br>(n=9,172) | p value<br>**** |
|--------------------------------------------------------------|---------------------|-------------------------------------|----------------------------------------------------|--------------------|--------------------------|-----------------|
| <b>Age, years**</b>                                          | 51.6 (10.2)         | 53.9 (10.9)                         | 50.8 (9.8)                                         | 49.9 (9.7)         | 50.0 (9.5)               | <0.001          |
| <b>Alcohol intake on a typical day, g per day**</b>          | 54.3 (37.0)         | 21.2 (6.8)                          | 50.1 (9.7)                                         | 80.5 (5.1)         | 126.0 (37.0)             | <0.001          |
| <b>Weekly alcohol intake, g per week**</b>                   | 285.4 (245.0)       | 100.8 (59.1)                        | 256.0 (114.5)                                      | 434.6 (151.4)      | 701.6 (319.1)            | <0.001          |
| <b>Smoking status</b>                                        |                     |                                     |                                                    |                    |                          |                 |
| Never                                                        | 5,492 (8.0%)        | 2,488 (11.0%)                       | 2,121 (7.3%)                                       | 440 (5.4%)         | 443 (4.8%)               | <0.001          |
| Occasional or current                                        | 54,813 (79.4%)      | 16,418 (72.7%)                      | 23,643 (81.0%)                                     | 6,820 (84.1%)      | 7,932 (86.5%)            |                 |
| Ex-regular                                                   | 8,734 (12.7%)       | 3,676 (16.3%)                       | 3,408 (11.7%)                                      | 853 (10.5%)        | 797 (8.7%)               |                 |
| <b>Physical activity, MET-h/d</b>                            | 22.9 (15.0)         | 21.6 (15.1)                         | 23.2 (14.8)                                        | 24.7 (15.2)        | 23.9 (15.0)              | <0.001          |
| <b>Frequency of drinking</b>                                 |                     |                                     |                                                    |                    |                          |                 |
| 1-2 days/week                                                | 13,786 (20.0%)      | 5,873 (26.0%)                       | 5,568 (19.1%)                                      | 1,159 (14.3%)      | 1,186 (12.9%)            | <0.001          |
| 3-5 days/week                                                | 12,443 (18.0%)      | 4,506 (20.0%)                       | 5,401 (18.5%)                                      | 1,295 (16.0%)      | 1,241 (13.5%)            |                 |
| Daily or almost every day                                    | 42,810 (62.0%)      | 12,203 (54.0%)                      | 18,203 (62.4%)                                     | 5,659 (69.8%)      | 6,745 (73.5%)            |                 |
| <b>Alcohol type</b>                                          |                     |                                     |                                                    |                    |                          |                 |
| Beer                                                         | 12,536 (18.2%)      | 6,228 (27.6%)                       | 5,075 (17.4%)                                      | 722 (8.9%)         | 511 (5.6%)               | <0.001          |
| Rice wine or grape wine                                      | 8,381 (12.1%)       | 5,487 (24.3%)                       | 2,251 (7.7%)                                       | 355 (4.4%)         | 288 (3.1%)               |                 |
| Spirits                                                      | 48,122 (69.7%)      | 10,867 (48.1%)                      | 21,846 (74.9%)                                     | 7,036 (86.7%)      | 8,373 (91.3%)            |                 |
| <b>Drinking with meals</b>                                   |                     |                                     |                                                    |                    |                          |                 |
| Usually drink with the meal                                  | 59,314 (85.9%)      | 19,566 (86.6%)                      | 25,027 (85.8%)                                     | 7,227 (89.1%)      | 7,494 (81.7%)            | <0.001          |
| Usually drink between or after the meals                     | 5,763 (8.3%)        | 1,916 (8.5%)                        | 2,558 (8.8%)                                       | 508 (6.3%)         | 781 (8.5%)               |                 |
| No regular pattern                                           | 3,962 (5.7%)        | 1,100 (4.9%)                        | 1,587 (5.4%)                                       | 378 (4.7%)         | 897 (9.8%)               |                 |
| <b>BMI, kg/m<sup>2</sup></b>                                 |                     |                                     |                                                    |                    |                          |                 |
| <18.5                                                        | 2,267 (3.3%)        | 951 (4.2%)                          | 872 (3.0%)                                         | 187 (2.3%)         | 257 (2.8%)               | <0.001          |
| 18.5-24.9                                                    | 43,579 (63.1%)      | 14,314 (63.4%)                      | 18,263 (62.6%)                                     | 5,145 (63.4%)      | 5,857 (63.9%)            |                 |
| 25-29.9                                                      | 20,914 (30.3%)      | 6,744 (29.9%)                       | 9,095 (31.2%)                                      | 2,416 (29.8%)      | 2,659 (29.0%)            |                 |
| 30+                                                          | 2,279 (3.3%)        | 573 (2.5%)                          | 942 (3.2%)                                         | 365 (4.5%)         | 399 (4.4%)               |                 |
| <b>Prevalent diabetes (self-reported or screen-detected)</b> | 3,446 (5.0%)        | 1,194 (5.3%)                        | 1,418 (4.9%)                                       | 355 (4.4%)         | 479 (5.2%)               | 0.005           |
| <b>Advanced ARLD</b>                                         |                     |                                     |                                                    |                    |                          |                 |
| ARC or AH                                                    | 232 (0.3%)          | 35 (0.2%)                           | 83 (0.3%)                                          | 32 (0.4%)          | 82 (0.9%)                | <0.001          |

|     |            |           |           |           |           |        |
|-----|------------|-----------|-----------|-----------|-----------|--------|
| ARC | 191 (0.3%) | 28 (0.1%) | 69 (0.2%) | 24 (0.3%) | 70 (0.8%) | <0.001 |
| AH  | 53 (0.1%)  | 8 (0.0%)  | 19 (0.1%) | 9 (0.1%)  | 17 (0.2%) | <0.001 |

Values are numbers (percentages) unless otherwise indicated

\* Based on average daily alcohol consumption: within daily limit (<32g for men), above daily limit but below binge (32-64g for men), binge (64-96g for men) and heavy binge (>=96g for men)

\*\* Mean (standard deviation)

\*\*\* Physical activity calculated as metabolic equivalent task hours per day (MET-h/d)

\*\*\*\* Two-sided p values from one-way ANOVA or chi-square test to compare the differences across binge groups

**Supplemental Table 15: Hazard ratios for risk of advanced ARLD associated with alcohol consumption – replication analyses in the CKB (male weekly drinkers, N=69,039)**

|                                   | AH (n=53) |              |         | ARC (n=191) |              |         |
|-----------------------------------|-----------|--------------|---------|-------------|--------------|---------|
|                                   | HR        | 95% CI       | p value | HR          | 95% CI       | p value |
| Alcohol consumption group         |           |              |         |             |              |         |
| Below daily limit                 | Ref       |              |         | Ref         |              |         |
| Above daily limit but below binge | 1.41      | (0.58, 3.41) | 0.443   | 1.53        | (0.96, 2.45) | 0.076   |
| Binge                             | 2.39      | (0.84, 6.83) | 0.103   | 1.96        | (1.08, 3.57) | 0.028   |
| Heavy binge                       | 2.67      | (0.92, 7.69) | 0.069   | 2.91        | (1.67, 5.10) | <0.001  |

HRs were derived from Cox regression with adjustment for age, study areas, education, physical activity, smoking, total weekly alcohol intake, beverage type, drinking with/without meal, diabetes, and BMI; p values were calculated using the two-sided Wald test

**Supplemental Table 16: Hazard ratios for risk ARC by diabetes and alcohol consumption – replication analyses in the CKB (male weekly drinkers, N=69,039)**

|                    | HR   | 95% CI        | p value |
|--------------------|------|---------------|---------|
| <b>ARC (n=191)</b> |      |               |         |
| Below binge*       |      |               |         |
| Without diabetes   | Ref  |               |         |
| With diabetes      | 1.56 | (0.62, 3.87)  | 0.343   |
| Binge              |      |               |         |
| Without diabetes   | 1.42 | (0.88, 2.30)  | 0.153   |
| With diabetes      | 2.16 | (0.30, 15.63) | 0.446   |
| Heavy binge        |      |               |         |
| Without diabetes   | 1.95 | (1.29, 2.95)  | 0.001   |
| With diabetes      | 6.69 | (2.98, 15.02) | <0.001  |

HRs were derived from Cox regression with adjustment for age, study areas, education, physical activity, smoking, total weekly alcohol intake, beverage type, drinking with/without meal, diabetes, and BMI; p values were calculated using the two-sided Wald test p=0.828 for multiplicative interaction, assessed through a two-sided likelihood ratio test comparing models with and without interaction terms, between diabetes and alcohol consumption

\*The two groups (below daily limit, above daily limit but below binge) were combined due to zero cases of ARC in participants who reported drinking below daily limit and had diabetes

**Supplemental Table 17: Two-way additive interaction of alcohol consumption and diabetes – replication analyses in the CKB (male weekly drinkers, N=69,039)**

|                         | RERI   | 95% CI          | p value | AP          | 95% CI              | p value           | S    | 95% CI         | p value |
|-------------------------|--------|-----------------|---------|-------------|---------------------|-------------------|------|----------------|---------|
| <b>ARC (n=191)</b>      |        |                 |         |             |                     |                   |      |                |         |
| Diabetes # Binge*       | -0.002 | (-2.918, 2.914) | 0.999   | -0.002      | (-2.232, 2.229)     | 0.999             | 0.99 | (-8.37, 10.36) | 0.999   |
| Diabetes # Heavy binge* | 4.37   | (-1.14, 9.88)   | 0.120   | <b>0.63</b> | <b>(0.29, 0.98)</b> | <b>†&lt;0.001</b> | 3.87 | (-1.17, 8.90)  | 0.264   |

Based on hazard ratio estimates derived from Cox regression with adjustment for age, study areas, education, physical activity, smoking, total weekly alcohol intake, beverage type, drinking with/without meal, diabetes, and BMI; p values were calculated using the two-sided Wald test

\*Compared to participants who reported drinking below binge and were free of diabetes

†RERI>0, AP>0 or S>1 indicates significant additive interaction

**Supplemental Table 18: Hazard ratios for risk of advanced ARLD associated with per 1 SD increase in PRS in the CKB**

|                                  | Cases (n) | HR   | 95% CI       | p value |
|----------------------------------|-----------|------|--------------|---------|
| Genotyped males*                 |           |      |              |         |
| AH (n=30,760)                    | 13        | 1.13 | (0.65, 1.97) | 0.656   |
| ARC (n=30,771)                   | 52        | 1.13 | (0.86, 1.48) | 0.386   |
| Genotyped male weekly drinkers** |           |      |              |         |
| AH (n=10,737)                    | 10        | 0.80 | (0.42, 1.52) | 0.489   |
| ARC (n=10,745)                   | 41        | 1.08 | (0.79, 1.48) | 0.626   |

Analyses were based on randomly-selected genotyped men (n=30,756 men without prior cirrhosis/hepatitis) and, to increase study power, additional recorded liver disease cases selected from a subset enriched by CVD/COPD cases (4 additional AH cases, 15 additional ARC cases); HRs were derived from Cox regression, with two-sided p values computed using the Wald test

\*Adjusted for age, study areas, education, smoking, BMI, physical activity, diabetes, alcohol consumption group (never, former, occasional, monthly, reduced intake, and weekly drinkers), 11 genomic PCs

\*\*Adjusted for age, study areas, education, smoking, BMI, physical activity, diabetes, total weekly alcohol intake, beverage type, drinking with/without meal, daily alcohol consumption group, 11 genomic PCs

## Cross-validation analyses using UKB sub-samples

**Supplemental Table 19: Hazard ratios for risk of advanced ARLD associated with alcohol consumption and polygenic risk – cross-validation using sub-samples**

|                                                 | ARC  |              |         | AH   |               |         |
|-------------------------------------------------|------|--------------|---------|------|---------------|---------|
|                                                 | HR   | 95% CI       | p value | HR   | 95% CI        | p value |
| <b>Sub-sample #1 (N=156303, ARC=362, AH=71)</b> |      |              |         |      |               |         |
| Alcohol consumption group *                     |      |              |         |      |               |         |
| Below daily limit                               | Ref  |              |         | Ref  |               |         |
| Above daily limit but below binge               | 1.31 | (0.81, 2.12) | 0.271   | 1.89 | (0.41, 8.80)  | 0.416   |
| Binge                                           | 2.40 | (1.50, 3.86) | <0.001  | 5.76 | (1.32, 25.03) | 0.020   |
| Heavy binge                                     | 3.83 | (2.39, 6.12) | <0.001  | 9.47 | (2.19, 41.00) | 0.003   |
| Polygenic risk score category **                |      |              |         |      |               |         |
| Low group                                       | Ref  |              |         | Ref  |               |         |
| Middle group                                    | 1.84 | (1.26, 2.68) | 0.002   | 1.32 | (0.65, 2.69)  | 0.450   |
| High group                                      | 3.85 | (2.62, 5.67) | <0.001  | 1.42 | (0.64, 3.14)  | 0.393   |
| <b>Sub-sample #2 (N=156296, ARC=372, AH=67)</b> |      |              |         |      |               |         |
| Alcohol consumption group *                     |      |              |         |      |               |         |
| Below daily limit                               | Ref  |              |         | Ref  |               |         |
| Above daily limit but below binge               | 1.34 | (0.86, 2.11) | 0.199   | 2.84 | (0.64, 12.54) | 0.169   |
| Binge                                           | 2.28 | (1.46, 3.57) | <0.001  | 4.47 | (1.01, 19.73) | 0.048   |
| Heavy binge                                     | 3.67 | (2.35, 5.71) | <0.001  | 8.91 | (2.07, 38.43) | 0.003   |
| Polygenic risk score category **                |      |              |         |      |               |         |
| Low group                                       | Ref  |              |         | Ref  |               |         |
| Middle group                                    | 1.59 | (1.11, 2.29) | 0.012   | 1.14 | (0.54, 2.37)  | 0.732   |
| High group                                      | 3.52 | (2.43, 5.09) | <0.001  | 1.97 | (0.90, 4.31)  | 0.090   |

HRs were derived from Cox regression, with two-sided p values computed using the Wald test

\*Adjusted for sex, age, ethnicity, Townsend deprivation index at recruitment, physical activity, smoking, total weekly alcohol intake, beverage type, drinking with/without meal, diabetes, and BMI

\*\*Adjusted for sex, age, ethnicity, Townsend deprivation index at recruitment, physical activity, smoking, total weekly alcohol intake, beverage type, drinking with/without meal, daily alcohol consumption group, diabetes, BMI, first 10 principal genetic components, and genotyping array

**Supplemental Table 20: Hazard ratios for risk of alcohol-related cirrhosis by alcohol consumption and polygenic risk group – cross-validation using sub-samples**

|                                   | Sub-sample #1 (N=156303, ARC=362) |                |         | Sub-sample #2 (N=156296, ARC=372) |               |         |
|-----------------------------------|-----------------------------------|----------------|---------|-----------------------------------|---------------|---------|
|                                   | HR                                | 95% CI         | p value | HR                                | 95% CI        | p value |
| Below daily limit                 |                                   |                |         |                                   |               |         |
| Low PRS                           | Ref                               |                |         | Ref                               |               |         |
| Mid PRS                           | 4.04                              | (0.52, 31.30)  | 0.182   | 0.91                              | (0.29, 2.86)  | 0.870   |
| High PRS                          | 11.55                             | (1.48, 90.33)  | 0.020   | 2.56                              | (0.80, 8.18)  | 0.112   |
| Above daily limit but below binge |                                   |                |         |                                   |               |         |
| Low PRS                           | 3.04                              | (0.37, 24.76)  | 0.298   | 1.20                              | (0.39, 3.74)  | 0.748   |
| Mid PRS                           | 4.79                              | (0.65, 35.11)  | 0.123   | 1.25                              | (0.45, 3.52)  | 0.669   |
| High PRS                          | 13.55                             | (1.85, 99.47)  | 0.010   | 3.10                              | (1.09, 8.82)  | 0.033   |
| Binge                             |                                   |                |         |                                   |               |         |
| Low PRS                           | 6.98                              | (0.90, 54.19)  | 0.063   | 1.00                              | (0.29, 3.43)  | 0.999   |
| Mid PRS                           | 9.95                              | (1.37, 72.27)  | 0.023   | 2.51                              | (0.91, 6.97)  | 0.077   |
| High PRS                          | 18.46                             | (2.52, 135.38) | 0.004   | 4.55                              | (1.61, 12.85) | 0.004   |
| Heavy binge                       |                                   |                |         |                                   |               |         |
| Low PRS                           | 7.20                              | (0.93, 56.08)  | 0.059   | 1.85                              | (0.59, 5.80)  | 0.289   |
| Mid PRS                           | 15.57                             | (2.15, 112.54) | 0.007   | 3.40                              | (1.23, 9.40)  | 0.019   |
| High PRS                          | 29.55                             | (4.07, 214.69) | 0.001   | 7.71                              | (2.78, 21.37) | <0.001  |

HRs were derived from Cox regression with adjustment for total weekly alcohol intake, diabetes, BMI, sex, age, ethnicity, Townsend deprivation index, physical activity, smoke, alcohol type, drinking with/without meals, genotyping array, and first 10 ancestry principal components; p values were calculated using the two-sided Wald test



**Supplemental Table 21: Hazard ratios for risk of alcohol-related cirrhosis by diabetes and (a) alcohol consumption and (b) polygenic risk – cross-validation using sub-samples**

|                                   | Sub-sample #1 (N=156303, ARC=362) |               |         | Sub-sample #2 (N=156296, ARC=372) |               |         |
|-----------------------------------|-----------------------------------|---------------|---------|-----------------------------------|---------------|---------|
|                                   | HR                                | 95% CI        | p value | HR                                | 95% CI        | p value |
| <b>(a) Alcohol consumption*</b>   |                                   |               |         |                                   |               |         |
| Below daily limit                 |                                   |               |         |                                   |               |         |
| Without diabetes                  | Ref                               |               |         |                                   |               |         |
| With diabetes                     | 3.65                              | (1.23, 10.86) | 0.020   | 2.16                              | (0.64, 7.27)  | 0.212   |
| Above daily limit but below binge |                                   |               |         |                                   |               |         |
| Without diabetes                  | 1.36                              | (0.80, 2.30)  | 0.254   | 1.22                              | (0.76, 1.99)  | 0.411   |
| With diabetes                     | 3.19                              | (1.42, 7.17)  | 0.005   | 3.75                              | (1.84, 7.65)  | <0.001  |
| Binge                             |                                   |               |         |                                   |               |         |
| Without diabetes                  | 2.42                              | (1.44, 4.06)  | 0.001   | 2.01                              | (1.24, 3.24)  | 0.004   |
| With diabetes                     | 5.75                              | (2.76, 11.96) | <0.001  | 5.61                              | (2.83, 11.13) | <0.001  |
| Heavy binge                       |                                   |               |         |                                   |               |         |
| Without diabetes                  | 3.67                              | (2.19, 6.17)  | <0.001  | 3.03                              | (1.88, 4.88)  | <0.001  |
| With diabetes                     | 8.81                              | (4.63, 16.75) | <0.001  | 8.83                              | (4.85, 16.09) | <0.001  |
| <b>(b) Genetic risk**</b>         |                                   |               |         |                                   |               |         |
| Low PRS                           |                                   |               |         |                                   |               |         |
| Without diabetes                  | Ref                               |               |         |                                   |               |         |
| With diabetes                     | 6.02                              | (2.68, 13.55) | <0.001  | 0.55                              | (0.08, 4.06)  | 0.562   |
| Mid PRS                           |                                   |               |         |                                   |               |         |
| Without diabetes                  | 2.25                              | (1.46, 3.46)  | <0.001  | 1.38                              | (0.95, 2.00)  | 0.089   |
| With diabetes                     | 3.85                              | (2.07, 7.17)  | <0.001  | 4.82                              | (2.92, 7.96)  | <0.001  |
| High PRS                          |                                   |               |         |                                   |               |         |
| Without diabetes                  | 4.42                              | (2.85, 6.87)  | <0.001  | 3.17                              | (2.17, 4.64)  | <0.001  |
| With diabetes                     | 12.47                             | (6.98, 22.29) | <0.001  | 8.57                              | (4.99, 14.73) | <0.001  |

HRs were derived from Cox regression, with two-sided p values computed using the Wald test

\*Adjusted for sex, age, ethnicity, Townsend deprivation index at recruitment, physical activity, smoking, total weekly alcohol intake, beverage type, drinking with/without meal, BMI, PRS group, genotyping array, and first 10 ancestry principal components

\*\*Adjusted for sex, age, ethnicity, Townsend deprivation index at recruitment, physical activity, smoking, total weekly alcohol intake, beverage type, drinking with/without meal, BMI, alcohol consumption group, genotyping array, and first 10 ancestry principal components

**Supplemental Table 22: Two-way additive interaction of alcohol consumption, PRS group and diabetes – cross-validation using sub-samples**

|                                          | <b>RERI</b> | <b>95% CI</b>        | <b>p value</b> | <b>AP</b>   | <b>95% CI</b>       | <b>p value</b>    | <b>S</b> | <b>95% CI</b> | <b>p value</b> |
|------------------------------------------|-------------|----------------------|----------------|-------------|---------------------|-------------------|----------|---------------|----------------|
| <b>Sub-sample #1 (N=156303, ARC=362)</b> |             |                      |                |             |                     |                   |          |               |                |
| Heavy binge # High PRS *                 | 15.53       | (-17.20, 48.25)      | 0.352          | <b>0.40</b> | <b>(0.10, 0.70)</b> | <b>†0.010</b>     | 1.70     | (0.79, 2.60)  | 0.131          |
| Diabetes # Heavy binge **                | 3.00        | (-2.72, 8.72)        | 0.304          | 0.30        | (-0.17, 0.78)       | 0.212             | 1.51     | (0.33, 2.68)  | 0.400          |
| Diabetes # High PRS ***                  | 2.59        | (-3.52, 8.71)        | 0.405          | 0.24        | (-0.24, 0.72)       | 0.337             | 1.35     | (0.40, 2.30)  | 0.471          |
| <b>Sub-sample #2 (N=156296, ARC=372)</b> |             |                      |                |             |                     |                   |          |               |                |
| Heavy binge # High PRS *                 | 0.51        | (-1.74, 2.77)        | 0.656          | 0.16        | (-0.57, 0.89)       | 0.660             | 1.31     | (-0.58, 3.21) | 0.745          |
| Diabetes # Heavy binge **                | <b>6.22</b> | <b>(0.08, 12.36)</b> | <b>†0.047</b>  | <b>0.55</b> | <b>(0.23, 0.87)</b> | <b>†0.001</b>     | 2.52     | (0.34, 4.69)  | 0.171          |
| Diabetes # High PRS ***                  | <b>5.92</b> | <b>(1.61, 10.23)</b> | <b>†0.007</b>  | <b>0.69</b> | <b>(0.49, 0.89)</b> | <b>†&lt;0.001</b> | 4.54     | (0.15, 8.92)  | 0.114          |

Based on hazard ratio estimates derived from Cox regression, with two-sided p values computed using the Wald test

\*Adjusted for total weekly alcohol intake, BMI, diabetes, sex, age, ethnicity, Townsend deprivation index, physical activity, smoke, alcohol type, drinking with/without meals, genotyping array, first 10 ancestry principal components

\*\*Adjusted for total weekly alcohol intake, BMI, sex, age, ethnicity, Townsend deprivation index, physical activity, smoke, alcohol type, drinking with/without meals, PRS group, genotyping array, first 10 ancestry principal components

\*\*\*Adjusted for total weekly alcohol intake, daily alcohol consumption group, BMI, sex, age, ethnicity, Townsend deprivation index, physical activity, smoke, alcohol type, drinking with/without meals, genotyping array, first 10 ancestry principal components

†RERI>0, AP>0 or S>1 indicates significant additive interaction

**Supplemental Table 23: Three-way additive interaction of alcohol consumption, PRS group and diabetes – cross-validation using sub-samples**

|                                            | Sub-sample #1 (N=156303, ARC=362)       |                     |                   | Sub-sample #2 (N=156296, ARC=372)       |                     |                   |
|--------------------------------------------|-----------------------------------------|---------------------|-------------------|-----------------------------------------|---------------------|-------------------|
|                                            | HR                                      | 95% CI              | p value           | HR                                      | 95% CI              | p value           |
| Below daily limit # Low PRS # No diabetes  | Ref                                     |                     |                   | Ref                                     |                     |                   |
| Heavy binge # Low PRS # No diabetes        | 4.87                                    | (0.61, 39.23)       | 0.137             | 1.85                                    | (0.59, 5.81)        | 0.289             |
| Below daily limit # High PRS # No diabetes | 8.25                                    | (1.01, 67.08)       | 0.049             | 2.45                                    | (0.75, 7.97)        | 0.136             |
| Below daily limit # Low PRS # Diabetes     | 1.18                                    | (0.13, 10.54)       | 0.880             | 2.19                                    | (0.59, 8.15)        | 0.243             |
| Heavy binge # High PRS # Diabetes          | 65.47                                   | (8.29, 517.10)      | <0.001            | 15.98                                   | (4.93, 51.78)       | <0.001            |
|                                            | <b>Total RERI</b>                       | <b>95% CI</b>       | <b>p value</b>    | <b>Total RERI</b>                       | <b>95% CI</b>       | <b>p value</b>    |
| Heavy binge # High PRS # Diabetes          | 69.63                                   | (-76.80, 216.06)    | 0.351             | 5.69                                    | (-1.29, 12.67)      | 0.110             |
|                                            | <b>AP</b>                               | <b>95% CI</b>       | <b>p value</b>    | <b>AP</b>                               | <b>95% CI</b>       | <b>p value</b>    |
| Heavy binge # High PRS # Diabetes          | <i>0.82</i>                             | <i>(0.66, 0.98)</i> | <i>†&lt;0.001</i> | <i>0.80</i>                             | <i>(0.41, 1.20)</i> | <i>†&lt;0.001</i> |
|                                            | <b>S</b>                                | <b>95% CI</b>       | <b>p value</b>    | <b>S</b>                                | <b>95% CI</b>       | <b>p value</b>    |
| Heavy binge # High PRS # Diabetes          | 5.82                                    | (0.26, 11.39)       | 0.090             | 15.27                                   | (-114.68, 145.23)   | 0.830             |
|                                            | <b>RERI beyond two-way interactions</b> | <b>95% CI</b>       | <b>p value</b>    | <b>RERI beyond two-way interactions</b> | <b>95% CI</b>       | <b>p value</b>    |
| Heavy binge # High PRS # Diabetes          | -40.53                                  | (-167.10, 86.05)    | 0.530             | 1.28                                    | (-10.72, 13.28)     | 0.834             |

HRs were derived from Cox regression with adjustment for total weekly alcohol intake, BMI, sex, age, ethnicity, Townsend deprivation index, physical activity, smoke, alcohol type, drinking with/without meals, genotyping array, first 10 ancestry principal components

RERI, AP, and S were computed based on HRs obtained from Cox regression with aforementioned adjustment

All p values were calculated using the two-sided Wald test

†RERI>0, AP>0 or S>1 indicates significant additive interaction
